# Supplementary material for: LRRK2 inhibition potentiates PARP inhibitor cytotoxicity through inhibiting homologous recombination‐mediated DNA double strand break repair
Source: PubMed Central journal article supplement (PMC7908045; doi:10.1002/ctm2.341), 2021-02-26

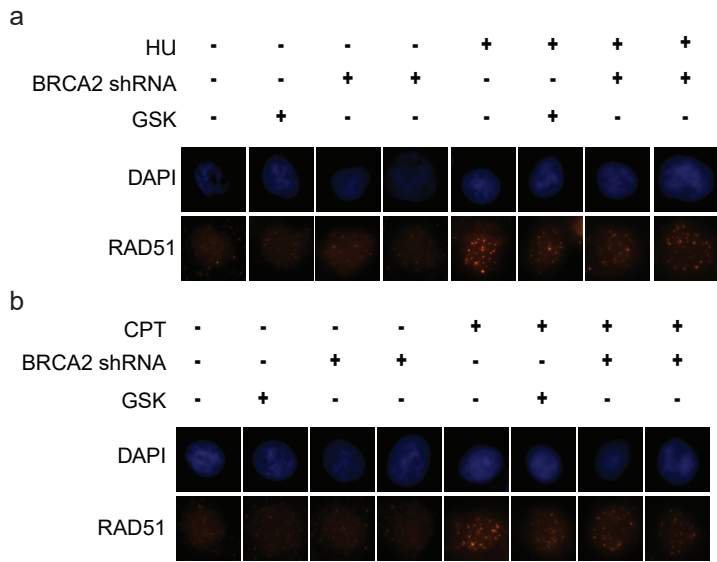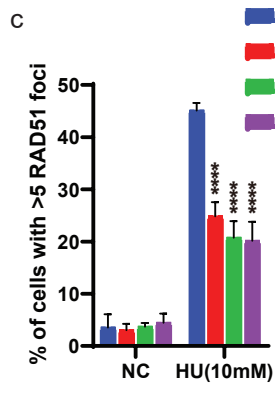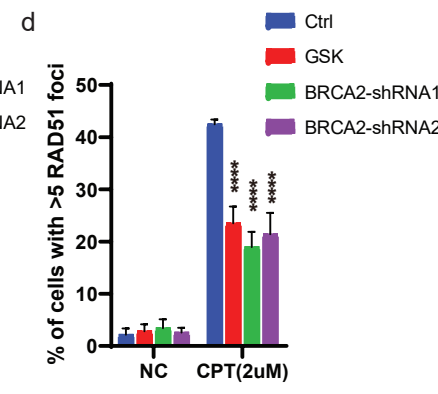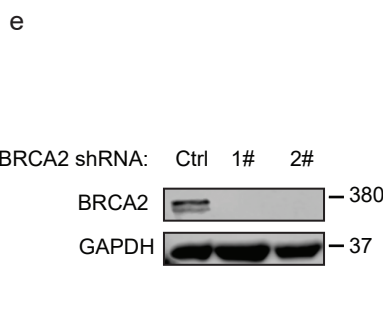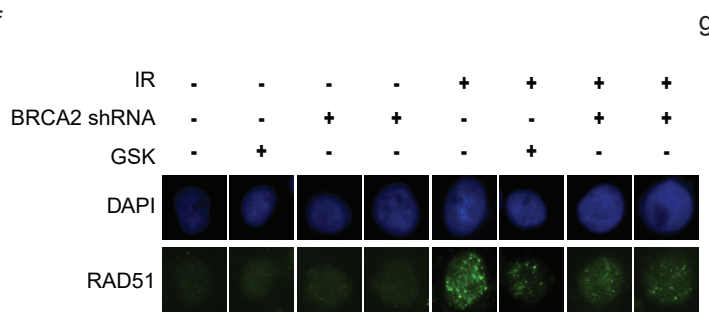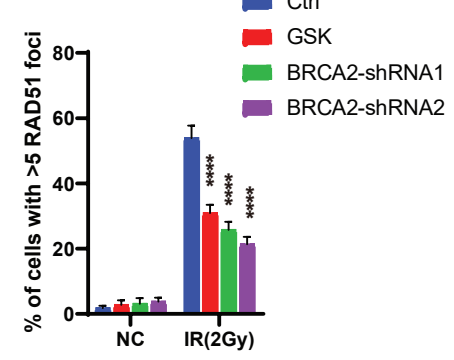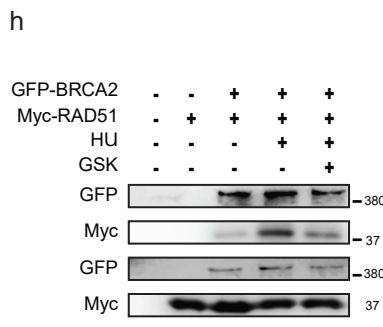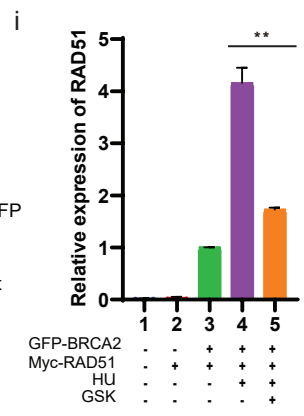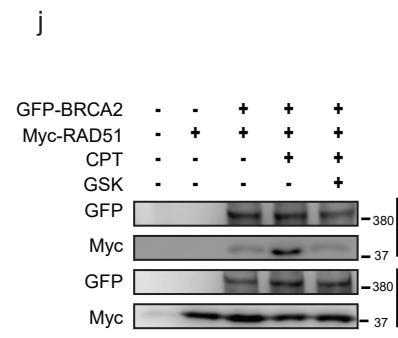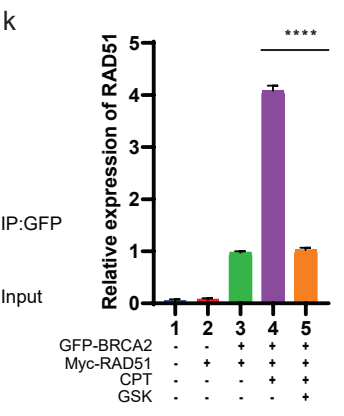

Supplement: CTM2-11-e341-s002.pdf [file CTM2-11-e341-s002.pdf]
